# Supplementary material for: A novel class of inferior colliculus principal neurons labeled in vasoactive intestinal peptide-Cre mice
Source: eLife. 2019 Apr 18;8:e43770. doi: 10.7554/eLife.43770 (PMC6516826; doi:10.7554/eLife.43770)
Supplement: Figure 3—source data 1. [file elife-43770-fig3-data1.xlsx]

## Sheet: merged
Figure 3B
	VIP neurons (n = 216 - 237)
		Rpk (MΩ)	Rss (MΩ)	Rheobase (pA)	Time const (ms)	sag ratio at -91 mV	SFA
	median	208.99	192.4	60	13.9	0.94	1.07
	9th percentile	97.45	55.69	25	4.89	0.56	0.7
	25th percentile	139.05	120.06	40	8.68	0.84	0.91
	75th percentile	311.61	322.49	100	19.76	0.97	1.44
	91st percentile	431.53	500.69	140	28	0.99	2.1
	Non-targeted recordings (C57, n = 55)
		Rpk (MΩ)	Rss (MΩ)	Rheobase (pA)	Time const (ms)	sag ratio at -91 mV	SFA
	median	140.69	99.78	90	7.22	0.86	1.66
	9th percentile	49.56	20.82	25	1.25	0.41	0.91
	25th percentile	73.73	39.61	40	2.75	0.54	1.24
	75th percentile	269.42	235.25	180	13.52	0.95	2.95
	91st percentile	421.92	392.11	300	20.1	0.98	9.76
