# Supplementary material for: A novel class of inferior colliculus principal neurons labeled in vasoactive intestinal peptide-Cre mice
Source: eLife. 2019 Apr 18;8:e43770. doi: 10.7554/eLife.43770 (PMC6516826; doi:10.7554/eLife.43770)
Supplement: Figure 4—source data 1. [file elife-43770-fig4-data1.xlsx]

## Sheet: Sheet1
Raw Data
		Neuron coordinates		Panel B1	Panel B2	Panel B3	Panel B4	Panel B5
	Neuron #	Medial-lateral coordinate (µm)	Dorsal-ventral coordinate (µm)	Rpk (MΩ)	Rss (MΩ)	Membrane time constant (ms)	Sag ratio -91 mV	Sag ratio -111 mV
	1	1206.37	748.492	154.29	144.5	9.901	0.8	0.849
	2	1009.09	616.6	207.25	173.72	11.435	0.861	0.891
	3	1341.42	847.281	285.9	113.75	14.314	0.774	0.831
	4	985.6	695.2	236.46	209.85	10.793	0.956
	5	670.211	224.966	174.63	115.61	6.248	0.687	0.74
	6	1081.68	454.956		500.5	23.55	0.896	0.932
	7	1407.85	1332.26	162.63	1.802	8.407	0.847	0.888
	8	815.67	764.691	68.67	35.04	6.571	0.573	0.687
	9	1337.05	899.091	167.74	174.31	17.497	0.979	0.963
	10	812.549	1523.22	144.83	125.19	11.188	0.873	0.906
	11	717.945	1471.55	155.39	162.85	20.626	0.962	0.954
	12	1768.71	1295.63	122.44	55.75	7.169	0.584	0.748
	13	438.353	616.001	124.25	104.01	4.297	0.881
	14	1586.61	657.805	93.04	16.53	3.319	0.337	0.292
	15	1030.72	748.137	294.38	269.25	13.595	0.905	0.916
	16	492.606	724.42	388.75	320.29	23.658	0.968	0.952
	17	521.463	1287.51	209.38	191.94	18.86	0.969	0.956
	18	1227.11	1519.72	468.67	410.61	20.189	0.936	0.726
	19	1013.58	1281.15	97.02	93.74	9.431	0.922	0.911
	20	735.752	767.544	40.21	14.45	14.363	0.48	0.466
	21	774.019	436.685	299.56	310.05	11.682	0.917	0.934
	22	1326.23	697.773	130.2	61.5	8.14	0.564
	23	617.793	1104.48	240.15	319.99	18.112	0.84
	24	799.946	624.162	243.86	210.49	17.164	0.92	0.948
	25	821.813	893.12	109.98	124.49	18.163		0.977
	26	720.593	1098.55	182.06	175.63	13.174	0.873	0.92
	27	765.899	807.365	102.09	94.91	8.431	0.965
	28	819.641	627.631	254.34	262.19	25.803	0.95	0.927
	29	881.696	1017.34	224.06	190.51	13.79	0.826	0.902
	30	628.491	1157.51	96.69	90.93	6.12	0.942
	31	717.599	749.95	163.02	180.29	10.3	0.968
	32	1141.04	339.459	85.62		7	0.464
	33	579.092	808.61	140.47	152.21	14.4	0.981
	34	810.058	364.286	163.5	163.97	9.6	0.97
	35	758.526	561.447	96.93	85.89	7.13	0.916	0.958
	36	814.787	392.563	364.63	315.32	13.312	0.938	0.932
	37	534.299	716.378	513.45	488.34	23.991	0.98	0.974
	38	880.325	1100.41	138.29	101.88	10.921	0.806	0.888
	39	638.149	1024.96	164.17	145.22	8.996	0.989	0.991
	40	671.691	1230.54	143.1	92.01	4.129	0.738
	41	664.526	574.967	98.86	61.21	9.969	0.698	0.851
	42	988.729	272.259	99.15	83.4	9.324	0.833	0.849
	43	1385.76	759.323	104.59	95.02	8.383	0.891	0.895
	44	671.526	372.543	427.65	389.34	14.768	0.927	0.93
	45	1395.06	369.28	128.43	83.64	10.32	0.678	0.728
	46	1419.72	1123.67	170.79	75.95	6.573	0.552	0.603
	47	1243.29	1168.05	241.69	190.08	12.915	0.806	0.855
	48	1066	720.933	74.84	40.66	6.258	0.667	0.792
	49	790.663	398.83	148.01	75.24	8.486	0.67	0.814
	50	751.983	532.753	198.43	144.22	10	0.755
	51	619.679	1164.81	274.07	262.23	17.295	0.975	0.964
	52	705.118	625.792	136.62	143.18	5.296	0.944
	53	582.405	684.908	326.08	569.25	31.446	0.89	0.969
	54	868.948	358.761	123.34	59.56	7.786	0.504	0.586
	55	719.471	617.193	315.27	359.53	19.449	0.98	0.976
	56	773.434	661.612	194.16	199.63	10.709	0.922	0.946
	57	608.255	1071.69	161.42	145.68	12.294	0.897	0.912
	58	569.539	831.708	179.6	185.16	18.396	0.981	0.957
	59	684.908	736.16	275.06	256.99	17.123	0.949	0.954
	60	894.574	419.332	130.49	136.87	7.489	0.937
	61	694.27	1157.12	396.12	372.01	19.079	0.969	0.987
Statistics from 3D Levenberg-Marquardt least square fits (physiological parameter versus medial-lateral and dorsal-ventral coordinates)
				Rpk (MΩ)	Rss (MΩ)	Membrane time constant (ms)	Sag ratio -91 mV	Sag ratio -111 mV
			n	60	60	61	60	47
			R	0.227	0.328	0.343	0.536	0.516
			R2adj	0.018	0.076	0.088	0.262	0.233
			p	0.084	0.011	0.007	1.24e-05	0.0002
