# Supplementary material for: A novel class of inferior colliculus principal neurons labeled in vasoactive intestinal peptide-Cre mice
Source: eLife. 2019 Apr 18;8:e43770. doi: 10.7554/eLife.43770 (PMC6516826; doi:10.7554/eLife.43770)
Supplement: Figure 5—source data 1. [file elife-43770-fig5-data1.xlsx]

## Sheet: Sheet1
Raw Data
	Panel F				Panel G				Panel H
	Neuron #	Long axis angle (°), sorted low to high			Neuron #	Length perpendicular to laminar plane (µm), sorted low to high			Neuron #	Dendritic arbor length/width ratio, sorted low to high
	1	1.6992			1	35.4914			1	0.986743
	2	3.2688			2	65.7426			2	1.15611
	3	13.0565			3	71.7225			3	1.17252
	4	13.7697			4	82.1779			4	1.19265
	5	15.4576			5	84.2302			5	1.1974
	6	16.7187			6	88.1275			6	1.21161
	7	19.1162			7	95.5732			7	1.22171
	8	20.0542			8	102.596			8	1.22359
	9	30.4908			9	104.599			9	1.23334
	10	38.0224			10	107.793			10	1.24688
	11	41.7127			11	110.391			11	1.30979
	12	47.3749			12	113.539			12	1.32383
	13	49.54			13	115.136			13	1.36428
	14	52.1649			14	116.718			14	1.40536
	15	56.2586			15	122.313			15	1.46574
	16	64.1044			16	130.255			16	1.63837
	17	69.7707			17	138.018			17	1.64134
	18	75.0552			18	152.571			18	1.66255
	19	77.6104			19	153.474			19	1.66268
	20	91.8819			20	153.882			20	1.6822
	21	93.6378			21	154.575			21	1.69087
	22	101.584			22	155.804			22	1.71118
	23	104.721			23	164.152			23	1.73082
	24	105.777			24	166.129			24	1.7595
	25	106.767			25	169.116			25	1.77222
	26	113.533			26	173.771			26	1.8202
	27	117.181			27	186.875			27	1.84943
	28	119.617			28	200.458			28	1.90318
	29	120.879			29	221.259			29	1.93051
	30	120.984			30	228.927			30	2.02205
	31	133.094			31	237.537			31	2.0479
	32	135.462			32	239.921			32	2.04992
	33	136.711			33	240.778			33	2.1335
	34	138.394			34	245.263			34	2.13576
	35	145.371			35	247.115			35	2.18159
	36	146.943			36	253.244			36	2.51088
	37	150.202			37	278.994			37	2.57379
	38	161.619			38	313.974			38	2.70791
	39	161.778			39	317.338			39	2.71488
	40	165.008			40	336.669			40	3.11303
	41	165.238			41	351.426			41	3.28357
	42	169.069			42	356.728			42	5.22701
