# Supplementary material for: A novel class of inferior colliculus principal neurons labeled in vasoactive intestinal peptide-Cre mice
Source: eLife. 2019 Apr 18;8:e43770. doi: 10.7554/eLife.43770 (PMC6516826; doi:10.7554/eLife.43770)
Supplement: Figure 7—source data 1. [file elife-43770-fig7-data1.xlsx]

## Sheet: Sheet1
Figure 7E
	control conditions
	Amplitude / mV	HW / ms	risetime /ms	decay / ms
Cell 1	-0.96901	20.3406	11.8535	35.4664
Cell 2	-1.51713	18.4896	6.46282	31.381
Cell 3	-1.65355	20.3351	7.34412	31.1754
Cell 4	-0.786697	17.9052	7.03817	62.3519
Cell 5	-0.911281	9.97695	6.05512	21.8877
Cell 6	-3.3698	3.79967	7.73653	11.8508
	Gabazine wash in
	Amplitude / mV	HW / ms	risetime /ms	decay / ms
Cell 1	-0.00358555	N.D.	N.D.	N.D.
Cell 2	0.0377372	N.D.	N.D.	N.D.
Cell 3	-0.0184515	N.D.	N.D.	N.D.
Cell 4	0.00634751	N.D.	N.D.	N.D.
Cell 5	-0.00826207	N.D.	N.D.	N.D.
Cell 6	0.0046431	N.D.	N.D.	N.D.
Figure 7F
	control conditions
	Amplitude / mV	HW / ms	risetime /ms	decay / ms
Cell 1	0.881782	11.2888	6.99251	39.5494
Cell 2	0.981776	22.514	12.8902	58.6191
Cell 3	3.59407	27.3734	5.19466	42.7357
Cell 4	1.84597	25.7742	7.21345	49.6051
Cell 5	1.02325	21.215	14.072	67.0771
Cell 6	1.42603	21.521	10.0408	32.5731
	AP5 wash in
	Amplitude / mV	HW / ms	risetime /ms	decay / ms
Cell 1	0.74683	8.73941	5.21967	20.9346
Cell 2	0.588257	10.1147	8.22137	35.3574
Cell 3	2.69837	19.5026	5.09974	37.7105
Cell 4	1.85614	19.8711	6.99398	37.4066
Cell 5	0.832938	12.222	8.03371	23.7627
Cell 6	1.39836	16.3787	6.87495	27.3041
	AP5 + NBQX wash in
	Amplitude / mV	HW / ms	risetime /ms	decay / ms
Cell 1	no value	no value	no value	no value
Cell 2	0.0357075	N.D.	N.D.	N.D.
Cell 3	-0.0247785	N.D.	N.D.	N.D.
Cell 4	0.0576756	N.D.	N.D.	N.D.
Cell 5	-0.000356161	N.D.	N.D.	N.D.
Cell 6	0.0247675	N.D.	N.D.	N.D.
	Commissural stim - EPSP
	Amplitude / mV	HW / ms	risetime /ms	decay / ms
Cell 1	1.7	no value	0.4	24
Cell 2	1.7	18.7	20.1	44.4
Cell 3	2.7	6.2	1.9	30.9
Cell 4	1.6	9.5	3.6	32.3
Cell 5	6.1	12.8	3.7	28.3
Cell 6	0.9	4.8	2	10.8
	Commissural stim - IPSP
	Amplitude / mV	HW / ms	risetime /ms	decay / ms
Cell 1	-1	5.9	3	18.9
Cell 2	-2.4	24.5	9.2	49.3
Cell 3	-4.4	7.9	4.3	55.1
Cell 4	-0.6	2.3	1.9	11.8
Cell 5	-1.1	4.4	2.9	28
Cell 6	-1	7.5	3.8	20.8
