# Supplementary material for: A novel class of inferior colliculus principal neurons labeled in vasoactive intestinal peptide-Cre mice
Source: eLife. 2019 Apr 18;8:e43770. doi: 10.7554/eLife.43770 (PMC6516826; doi:10.7554/eLife.43770)
Supplement: Figure 8—source data 1. [file elife-43770-fig8-data1.xlsx]

## Sheet: Sheet1
Figure 8B
	control conditions
	Amplitude / mV	HW / ms	risetime /ms	decay / ms
Cell 1	1.87798	14.5216	4.11675	23.0797
Cell 2	1.08811	10.2874	4.403	27.4519
Cell 3	9.4688	19.2134	2.3372	24.2513
Cell 4	1.59707	11.3147	3.90263	23.7534
Cell 5	2.99942	26.2523	6.81241	51.2789
Cell 6	1.82293	15.6362	4.1951	26.3883
Cell 7	1.12836	9.71583	3.79212	23.6235
	AP5 wash in
	Amplitude / mV	HW / ms	risetime /ms	decay / ms
Cell 1	2.32341	18.8264	7.306	28.6493
Cell 2	1.10197	8.97094	5.219	29.3098
Cell 3	8.42163	15.4581	2.00039	22.612
Cell 4	2.25268	17.4268	3.84346	35.4844
Cell 5	2.53648	25.9331	5.02583	42.0087
Cell 6	1.78399	12.9923	4.0644	21.5669
Cell 7	1.17048	8.37039	3.39574	26.7584
	AP5 + NBQX wash in
	Amplitude / mV	HW / ms	risetime /ms	decay / ms
Cell 1	-0.0332504	N.D.	N.D.	N.D.
Cell 2	0.00435883	N.D.	N.D.	N.D.
Cell 3	-0.0283754	N.D.	N.D.	N.D.
Cell 4	-0.056205	N.D.	N.D.	N.D.
Cell 5	-0.00431728	N.D.	N.D.	N.D.
Cell 6	0.0786519	N.D.	N.D.	N.D.
Cell 7	0.0288809	N.D.	N.D.	N.D.
Figure 8E
	Control conditions	Gabazine wash in
	HW / ms	HW / ms	reduction
Cell 1	2.15098	7.69323	0.720407
Cell 2	9.19864	14.4669	0.364157
Cell 3	7.97309	29.1713	0.72668
Cell 4	10.8746	14.3422	0.241777
Cell 5	5.43607	7.58307	0.283131
Figure 8F
	NT Neurons
	Amplitude / mV	HW / ms	decay / ms
Cell 1	2.2	7.1	6.3
Cell 2	1.6	13.3	19.2
Cell 3	1.6	25.6	30.5
Cell 4	2.2	27	52.7
Cell 5	1.3	19.3	38.3
Cell 6	0.9	4.9	6.3
Cell 7	2.6	24.4	42.8
Cell 8	0.9	7.3	10.7
