# Supplementary material for: A novel class of inferior colliculus principal neurons labeled in vasoactive intestinal peptide-Cre mice
Source: eLife. 2019 Apr 18;8:e43770. doi: 10.7554/eLife.43770 (PMC6516826; doi:10.7554/eLife.43770)
Supplement: Table 2—source data 1. [file elife-43770-table2-data1.xlsx]

## Sheet: ICc
Table 2 - ICc
		Purple shading indicates sample site that was split between ICc and IC shell
	P54 Male 1 Caudal Slice						P54 Male 2 Caudal Slice
	Coordinates	VIP	NeuN	Percent VIP			Coordinates	VIP	NeuN	Percent VIP
	Coord 2	2	37	0.0540541			Coord 3	4	45	0.0888889
	Coord 8	6	199	0.0301508			Coord 4	7	143	0.048951
	Coord 9	2	122	0.0163934			Coord 6	8	75	0.106667
	Coord 11	1	22	0.0454545			Coord 7	7	75	0.0933333
	Coord12	1	123	0.00813008			Total	26	338
	Total	12	503
									Mean	0.08446
			Mean	0.0308366					SEM	0.0124243
			SEM	0.00859475					Total Samples	4
			Total Samples	5
	P54 Male 1 Middle Slice						P54 Male 2 Middle Slice
	Coordinates	VIP	NeuN	Percent VIP			Coordinates	VIP	NeuN	Percent VIP
	Coord 2	5	114	0.0438596			Coord 1	5	94	0.0531915
	Coord 3	0	109	0			Coord 4	1	137	0.00729927
	Coord 4	0	70	0			Coord 5	15	202	0.0742574
	Coord 7	4	73	0.0547945			Coord 6	0	165	0
	Coord 8	3	133	0.0225564			Coord 7	4	111	0.036036
	Coord 9	0	52	0			Coord 9	10	226	0.0442478
	Coord 12	7	156	0.0448718			Coord 10	7	207	0.0338164
	Coord 13	1	34	0.0294118			Coord 11	2	31	0.0645161
	Total	20	741				Total	44	1173
			Mean	0.0244368					Mean	0.0391706
			SEM	0.00794646					SEM	0.00914609
			Total Samples	8					Total Samples	8
	P54 Male 1 Rostral Slice						P54 Male 2 Rostral Slice
	Coordinates	VIP	NeuN	Percent VIP			Coordinates	VIP	NeuN	Percent VIP
	Coord 2	5	166	0.0301205			Coord 0	2	143	0.013986
	Coord 3	1	122	0.00819672			Coord 1	2	234	0.00854701
	Coord 4	0	87	0			Coord 3	0	148	0
	Coord 7	7	134	0.0522388			Coord 4	4	157	0.0254777
	Coord 8	2	151	0.013245			Coord 6	2	108	0.0185185
	Coord 9	0	55	0			Coord 7	2	137	0.0145985
	Coord 12	5	166	0.0301205			Coord 9	0	97	0
	Coord 13	1	48	0.0208333			Total	12	1024
	Total	21	929
									Mean	0.0115897
			Mean	0.0193444					SEM	0.00356431
			SEM	0.00630531					Total Samples	7
			Total Samples	8
	Per mouse summary statistics
		Percent VIP Mean	Percent VIP SEM	VIP count	NeuN count
	P54 Male 1	0.0248726	0.00332467	53	2173
	P54 Male 2	0.0450734	0.0212419	82	2535
	Per slice plane summary statistics
		Percent VIP Mean	Percent VIP SEM	VIP count	NeuN count
	Caudal	0.0576483	0.0268117	38	841
	Middle	0.0318037	0.0073669	64	1914
	Rostral	0.015467	0.00387734	33	1953
	Grand Average across slices and mice
		Percent VIP Mean	Percent VIP SEM	VIP count	NeuN count
		0.034973	0.0101004	135	4708

## Sheet: IC shell
Table 2 - IC shell
		Purple shading indicates sample site that was split between ICc and IC shell
	P54 Male 1 Caudal Slice						P54 Male 2 Caudal Slice
	Coordinates	VIP	NeuN	Percent VIP			Coordinates	VIP	NeuN	Percent VIP
	Coord 0	7	179	0.0391061			Coord 1	1	159	0.00628931
	Coord 1	11	194	0.056701			Coord 2	1	150	0.00666667
	Coord 2	2	86	0.0232558			Coord 3	1	51	0.0196078
	Coord 3	1	94	0.0106383			Coord 5	3	193	0.015544
	Coord 4	2	152	0.0131579			Coord 7	3	62	0.0483871
	Coord 5	1	117	0.00854701			Total	9	615
	Coord 6	1	57	0.0175439
	Coord 10	4	89	0.0449438					Mean	0.019299
	Coord 11	6	82	0.0731707					SEM	0.00771084
	Coord13	0	42	0					Total Samples	5
	Total:	35	1092
			Mean	0.0287065
			SEM	0.00751707
			Total Samples	10
	P54 Male 1 Middle Slice						P54 Male 2 Middle Slice
	Coordinates	VIP	NeuN	Percent VIP			Coordinates	VIP	NeuN	Percent VIP
	Coord 2	0	29	0			Coord 1	0	60	0
	Coord 6	1	179	0.00558659			Coord 2	0	143	0
	Coord 9	2	54	0.037037			Coord 3	0	93	0
	Coord 11	0	76	0			Coord 8	4	168	0.0238095
	Coord 13	0	106	0			Coord 11	5	111	0.045045
	Coord 14	1	90	0.0111111			Coord 12	0	143	0
	Total:	4	534				Coord 13	1	198	0.00505051
							Coord 14	0	28	0
			Mean	0.00895579			Total	10	944
			SEM	0.00590246
			Total Samples	6					Mean	0.00923813
									SEM	0.00588386
									Total Samples	8
	P54 Male 1 Rostral Slice						P54 Male 2 Rostral Slice
	Coordinates	VIP	NeuN	Percent VIP			Coordinates	VIP	NeuN	Percent VIP
	Coord 6	3	200	0.015			Coord 0	1	40	0.025
	Coord 9	2	53	0.0377358			Coord 2	1	246	0.00406504
	Coord 10	2	154	0.012987			Coord 5	3	168	0.0178571
	Coord 11	2	153	0.0130719			Coord 10	0	115	0
	Coord 13	1	69	0.0144928			Total	5	569
	Coord 15	0	44	0
	Coord 16	0	86	0					Mean	0.0117305
	Coord 17	0	83	0					SEM	0.00584508
	Total:	10	842						Total Samples	4
			Mean	0.0116609
			SEM	0.00445363
			Total Samples	8
	Per mouse summary statistics
		Percent VIP Mean	Percent VIP SEM	VIP count	NeuN count
	P54 Male 1	0.0164411	0.00618222	49	2468
	P54 Male 2	0.0134226	0.00302503	24	2128
	Per slice plane summary statistics
		Percent VIP Mean	Percent VIP SEM	VIP count	NeuN count
	Caudal	0.0240027	0.00470373	44	1707
	Middle	0.00909696	0.000141172	14	1478
	Rostral	0.0116957	3.48035e-05	15	1411
	Grand Average across slices and mice
		Percent VIP Mean	Percent VIP SEM	VIP count	NeuN count
		0.0149318	0.00150925	73	4596
